# Supplementary material for: Molecular Imaging of Ultrasound-Mediated Blood-Brain Barrier Disruption in a Mouse Orthotopic Glioblastoma Model
Source: MDPI journal article supplement (doi:10.3390/pharmaceutics14102227), 2022-10-19
Supplement: s1 [file s1]

## Supplementary Materials

# Molecular Imaging of Ultrasound-Mediated Blood-Brain Barrier Disruption in a Mouse Orthotopic Glioblastoma Model

Chiara Bastiancich <sup>1,†</sup>, Samantha Fernandez <sup>2,†</sup>, Florian Correard <sup>3</sup>, Anthony Novell <sup>4</sup>,  
Benoit Larrat <sup>5</sup>, Benjamin Guillet <sup>2,6,\*‡</sup> and Marie-Anne Estève <sup>3,\*‡</sup>

<sup>1</sup> CNRS, INP, Inst Neurophysiopathol, Aix-Marseille University, 13005 Marseille, France

<sup>2</sup> Centre Européen de Recherche en Imagerie Médicale (CERIMED), CNRS, Aix-Marseille University, 13005 Marseille, France

<sup>3</sup> APHM, CNRS, INP, Inst Neurophysiopathol, Hôpital Timone, Service Pharmacie, Aix Marseille University, 13005 Marseille, France

<sup>4</sup> CEA, CNRS, Inserm, BioMaps, Service Hospitalier Frédéric Joliot, Université Paris-Saclay, 91401 Orsay, France

<sup>5</sup> CEA, CNRS, NeuroSpin/BAOBAB, Université Paris-Saclay, 91191 Gif-sur-Yvette, France

<sup>6</sup> Centre de Recherche en Cardiovasculaire et Nutrition (C2VN), INSERM, INRAE, Aix-Marseille University, 13005 Marseille, France

\* Correspondence: benjamin.guillet@univ-amu.fr (B.G.); marie-anne.esteve@univ-amu.fr (M.-A.E.)

† These authors contributed equally to this work.

‡ These authors contributed equally to this work.

## Supplementary data

### Section S1. BBB permeabilization and [99mTc]Tc-DTPA SPECT/CT imaging on healthy and tumor-bearing animals: raw data.

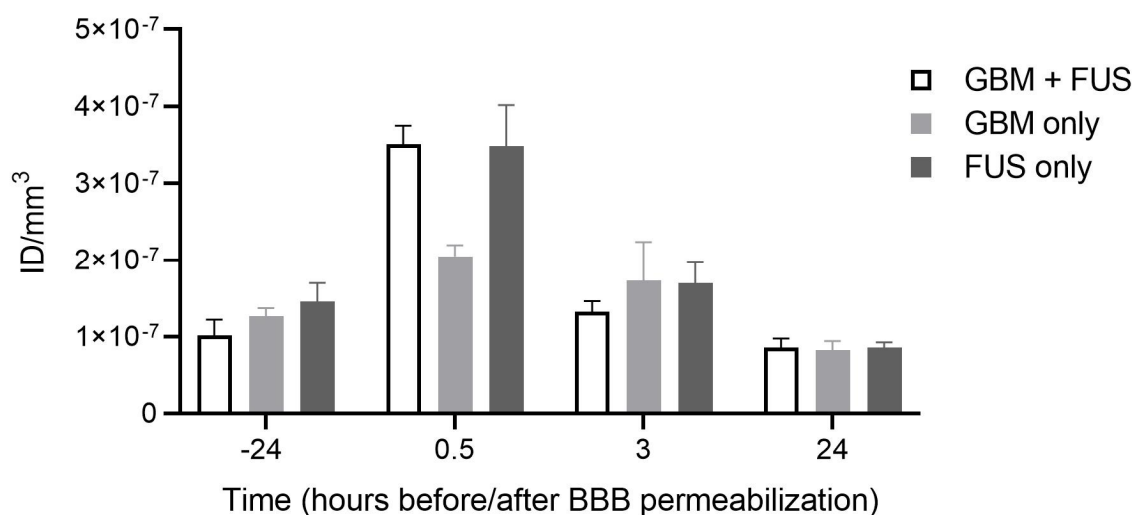

**Figure S1.** Quantification of [99mTc]Tc-DTPA activity in animals of group “GBM+FUS” (tumor-bearing animals undergoing FUS-mediated BBB permeabilization,  $n = 5$ ), group “GBM only” (tumor-bearing animals without FUS-mediated BBB permeabilization,  $n = 5$ ) and group “FUS only” (healthy animals undergoing FUS-mediated BBB permeabilization,  $n = 4$ ). Results are expressed as injected dose per tissue volume (ID/mm<sup>3</sup>; mean ± SEM).

### Section S2. BBB permeabilization and [18F]FDG PET/CT imaging on healthy and tumor-bearing animals: raw data.

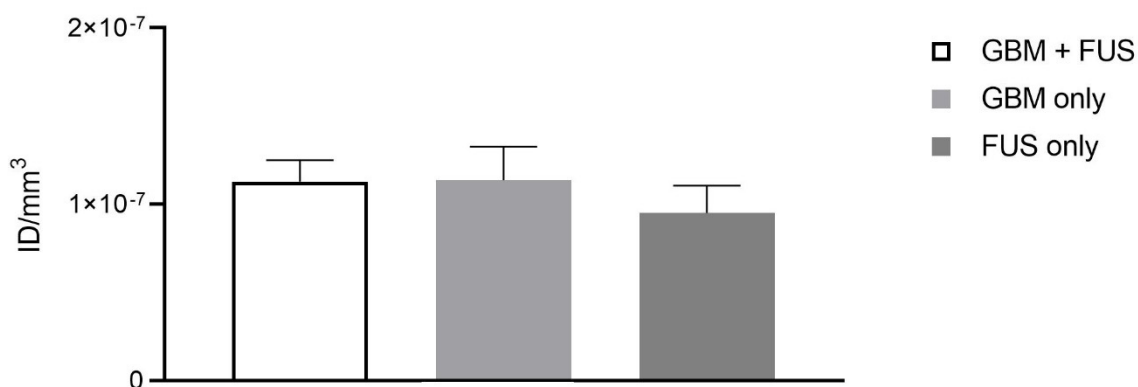

**Figure S2.** Quantification of [18F]FDG activity in animals of group “GBM+FUS” (tumor-bearing animals undergoing FUS-mediated BBB permeabilization,  $n = 5$ ), group “GBM only” (tumor-bearing animals without FUS-mediated BBB permeabilization,  $n = 5$ ) and group “FUS only” (healthy animals undergoing hemispheric FUS-mediated BBB permeabilization,  $n = 4$ ). Results are expressed as injected dose per tissue volume (ID/mm<sup>3</sup>; mean  $\pm$  SEM).
